# Supplementary material for: Impacts of using different standard populations in calculating age-standardised death rates when age-speciﬁc death rates in the populations being compared do not have a consistent relationship: a cross-sectional population-based observational study on US state HIV death rates
Source: HighWire-hosted journal article supplement (doi:10.1136/bmjopen-2021-056441), 2022-04-01
Supplement: bmjopen-2021-056441supp001_data_supplement.pdf [file bmjopen-2021-056441supp001_data_supplement.pdf]

## Supplementary Tables

Supplementary Table 1. State HIV age-standardized death rates (SDRs) and rankings, comparison between 15 to 84 and 18 to 84-year-old standard populations (US2000 and US2020), 2015 to 2019

Supplementary Table 2. State HIV age-standardized death rates (SDR) and rankings, comparison between all ages and 15 to 84-year-old standard populations (US2000 and US2020), 2015 to 2019

Supplementary Table 1. State HIV age-standardized death rates (SDRs)\* and rankings, comparison between 15 to 84 and 18 to 84-year-old standard populations (US2000 and US2020), 2015 to 2019

| State          | US2000<br>15 to 84 |      | US2000<br>18 to 84 |      | US2020<br>15 to 84 |      | US2020<br>18 to 84 |      |
|----------------|--------------------|------|--------------------|------|--------------------|------|--------------------|------|
|                | SDR                | Rank | SDR                | Rank | SDR                | Rank | SDR                | Rank |
| USA            | 2.11               |      | 2.31               |      | 2.33               |      | 2.33               |      |
| Wisconsin      | 0.57               | 1    | 0.63               | 1    | 0.63               | 1    | 0.63               | 1    |
| Minnesota      | 0.66               | 2    | 0.72               | 2    | 0.72               | 2    | 0.72               | 2    |
| Kansas         | 0.96               | 3    | 1.05               | 3    | 1.07               | 3    | 1.08               | 3    |
| Washington     | 0.98               | 4    | 1.08               | 4    | 1.11               | 4    | 1.11               | 4    |
| Michigan       | 1.00               | 5    | 1.10               | 5    | 1.12               | 5    | 1.12               | 5    |
| Colorado       | 1.06               | 6    | 1.17               | 6    | 1.18               | 6    | 1.18               | 6    |
| Oregon         | 1.07               | 7    | 1.18               | 7    | 1.19               | 7    | 1.19               | 7    |
| Massachusetts  | 1.16               | 8    | 1.28               | 8    | 1.38               | 11   | 1.38               | 11   |
| Missouri       | 1.23               | 9    | 1.36               | 10   | 1.36               | 10   | 1.36               | 10   |
| Ohio           | 1.24               | 10   | 1.36               | 9    | 1.33               | 8    | 1.34               | 8    |
| Pennsylvania   | 1.28               | 11   | 1.41               | 11   | 1.44               | 12   | 1.45               | 12   |
| Kentucky       | 1.29               | 12   | 1.41               | 12   | 1.35               | 9    | 1.35               | 9    |
| New Mexico     | 1.31               | 13   | 1.44               | 13   | 1.46               | 13   | 1.46               | 13   |
| Indiana        | 1.43               | 14   | 1.57               | 14   | 1.54               | 14   | 1.55               | 14   |
| Illinois       | 1.49               | 15   | 1.64               | 15   | 1.65               | 15   | 1.66               | 15   |
| Virginia       | 1.57               | 16   | 1.73               | 16   | 1.76               | 17   | 1.76               | 17   |
| Arizona        | 1.60               | 17   | 1.76               | 17   | 1.72               | 16   | 1.72               | 16   |
| Connecticut    | 1.69               | 18   | 1.86               | 18   | 2.00               | 19   | 2.00               | 18   |
| Oklahoma       | 1.85               | 19   | 2.03               | 19   | 2.00               | 18   | 2.01               | 19   |
| California     | 1.99               | 20   | 2.18               | 20   | 2.22               | 21   | 2.23               | 21   |
| Arkansas       | 2.07               | 21   | 2.26               | 21   | 2.18               | 20   | 2.20               | 20   |
| North Carolina | 2.28               | 22   | 2.50               | 22   | 2.55               | 23   | 2.55               | 23   |
| Tennessee      | 2.36               | 23   | 2.59               | 23   | 2.48               | 22   | 2.49               | 22   |
| Nevada         | 2.40               | 24   | 2.62               | 24   | 2.55               | 24   | 2.57               | 24   |
| Delaware       | 2.45               | 25   | 2.67               | 25   | 2.76               | 26   | 2.78               | 26   |
| New Jersey     | 2.56               | 26   | 2.82               | 26   | 3.02               | 28   | 3.03               | 28   |
| Alabama        | 2.63               | 27   | 2.89               | 27   | 2.73               | 25   | 2.74               | 25   |
| Texas          | 2.70               | 28   | 2.97               | 28   | 2.93               | 27   | 2.94               | 27   |
| New York       | 2.81               | 29   | 3.08               | 29   | 3.24               | 29   | 3.25               | 29   |
| South Carolina | 3.26               | 30   | 3.59               | 30   | 3.53               | 30   | 3.54               | 30   |
| Maryland       | 3.51               | 31   | 3.87               | 31   | 4.03               | 31   | 4.03               | 31   |
| Georgia        | 3.95               | 32   | 4.34               | 32   | 4.27               | 32   | 4.29               | 32   |
| Mississippi    | 4.23               | 33   | 4.65               | 33   | 4.46               | 33   | 4.47               | 33   |
| Florida        | 4.28               | 34   | 4.70               | 34   | 4.68               | 34   | 4.70               | 34   |
| Louisiana      | 4.55               | 35   | 4.97               | 35   | 4.79               | 35   | 4.83               | 35   |
| DC             | 13.32              | 36   | 14.56              | 36   | 15.57              | 36   | 15.57              | 36   |

\*Deaths per 100 000 persons

Supplementary Table 2. State HIV age-standardized death rates (SDR)\* and rankings, comparison between all ages and 15 to 84-year-old standard populations (US2000 and US2020), 2015 to 2019

| State          | US2000<br>All Ages |      | US2000<br>15 to 84 |      | US2020<br>All Ages |      | US2020<br>15 to 84 |      |
|----------------|--------------------|------|--------------------|------|--------------------|------|--------------------|------|
|                | SDR                | Rank | SDR                | Rank | SDR                | Rank | SDR                | Rank |
| USA            | 1.63               |      | 2.11               |      | 1.77               |      | 2.33               |      |
| Wisconsin      | 0.44               | 1    | 0.57               | 1    | 0.48               | 1    | 0.63               | 1    |
| Minnesota      | 0.51               | 2    | 0.66               | 2    | 0.55               | 2    | 0.72               | 2    |
| Kansas         | 0.74               | 3    | 0.96               | 3    | 0.82               | 3    | 1.07               | 3    |
| Washington     | 0.76               | 4    | 0.98               | 4    | 0.85               | 4    | 1.11               | 4    |
| Michigan       | 0.77               | 5    | 1.00               | 5    | 0.85               | 5    | 1.12               | 5    |
| Colorado       | 0.82               | 6    | 1.06               | 6    | 0.90               | 6    | 1.18               | 6    |
| Oregon         | 0.83               | 7    | 1.07               | 7    | 0.91               | 7    | 1.19               | 7    |
| Massachusetts  | 0.91               | 8    | 1.16               | 8    | 1.01               | 8    | 1.38               | 11   |
| Missouri       | 0.95               | 9    | 1.23               | 9    | 1.03               | 9    | 1.36               | 10   |
| Ohio           | 0.96               | 10   | 1.24               | 10   | 1.03               | 10   | 1.33               | 8    |
| Pennsylvania   | 0.99               | 11   | 1.28               | 11   | 1.06               | 11   | 1.44               | 12   |
| Kentucky       | 1.00               | 12   | 1.29               | 12   | 1.10               | 12   | 1.35               | 9    |
| New Mexico     | 1.01               | 13   | 1.31               | 13   | 1.10               | 13   | 1.46               | 13   |
| Indiana        | 1.11               | 14   | 1.43               | 14   | 1.17               | 14   | 1.54               | 14   |
| Illinois       | 1.16               | 15   | 1.49               | 15   | 1.26               | 15   | 1.65               | 15   |
| Virginia       | 1.21               | 16   | 1.57               | 16   | 1.30               | 16   | 1.76               | 17   |
| Arizona        | 1.23               | 17   | 1.60               | 17   | 1.33               | 17   | 1.72               | 16   |
| Connecticut    | 1.31               | 18   | 1.69               | 18   | 1.52               | 18   | 2.00               | 19   |
| Oklahoma       | 1.43               | 19   | 1.85               | 19   | 1.53               | 19   | 2.00               | 18   |
| California     | 1.54               | 20   | 1.99               | 20   | 1.65               | 20   | 2.22               | 21   |
| Arkansas       | 1.59               | 21   | 2.07               | 21   | 1.70               | 21   | 2.18               | 20   |
| North Carolina | 1.76               | 22   | 2.28               | 22   | 1.89               | 22   | 2.55               | 23   |
| Tennessee      | 1.82               | 23   | 2.36               | 23   | 1.93               | 23   | 2.48               | 22   |
| Nevada         | 1.86               | 24   | 2.40               | 24   | 1.95               | 24   | 2.55               | 24   |
| Delaware       | 1.90               | 25   | 2.45               | 25   | 2.07               | 25   | 2.76               | 26   |
| New Jersey     | 1.98               | 26   | 2.56               | 26   | 2.11               | 26   | 3.02               | 28   |
| Alabama        | 2.02               | 27   | 2.63               | 27   | 2.23               | 27   | 2.73               | 25   |
| Texas          | 2.09               | 28   | 2.70               | 28   | 2.30               | 28   | 2.93               | 27   |
| New York       | 2.18               | 29   | 2.81               | 29   | 2.47               | 29   | 3.24               | 29   |
| South Carolina | 2.53               | 30   | 3.26               | 30   | 2.69               | 30   | 3.53               | 30   |
| Maryland       | 2.73               | 31   | 3.51               | 31   | 3.08               | 31   | 4.03               | 31   |
| Georgia        | 3.06               | 32   | 3.95               | 32   | 3.25               | 32   | 4.27               | 32   |
| Mississippi    | 3.28               | 33   | 4.23               | 33   | 3.40               | 33   | 4.46               | 33   |
| Florida        | 3.31               | 34   | 4.28               | 34   | 3.57               | 34   | 4.68               | 34   |
| Louisiana      | 3.51               | 35   | 4.55               | 35   | 3.63               | 35   | 4.79               | 35   |
| DC             | 10.25              | 36   | 13.32              | 36   | 11.79              | 36   | 15.57              | 36   |

\*Deaths per 100 000 persons
